# Supplementary material for: Application of alkaline ionic liquid/Brønsted acid synergistic catalysis for the synthesis of cyclic carbonates from aliphatic diols and CO 2
Source: Royal Society of Chemistry journal article supplement (doi:10.1039/d4nj04742g), 2024-12-04
Supplement: d4nj04742g1.pdf [file d4nj04742g1.pdf]

## Supporting Information

### Application of alkaline ionic liquid/brownsted acid synergistic catalysis for the synthesis of cyclic carbonates from aliphatic diols and CO<sub>2</sub>

#### Figures :

Figure. S1 The influence of reaction conditions on selectivity.

Figure. S2 NMR spectrum of the product

Figure. S3 GC spectrum of the product

Figure. S4 HRMS of the [DBUH]PHY

Figure. S5 HRMS of the [TBDH]PHY

Figure. S6 HRMS of the [DBUH]TBD

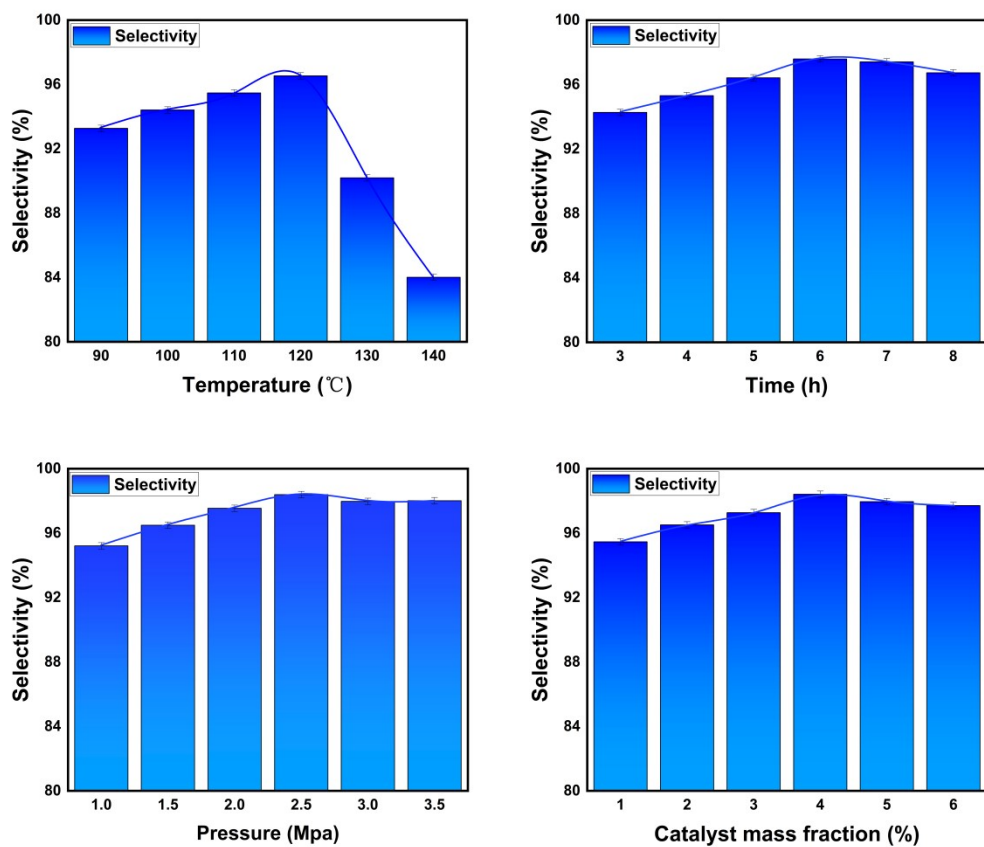

Figure. S1 The influence of reaction conditions on selectivity

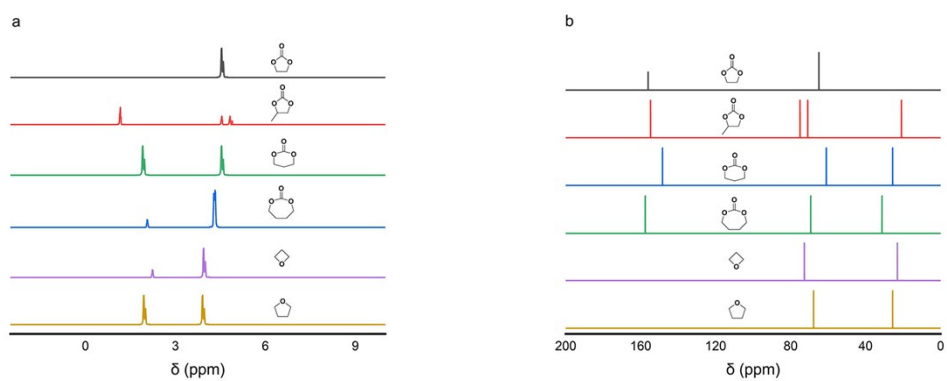

Figure. S2 NMR spectrum of the product

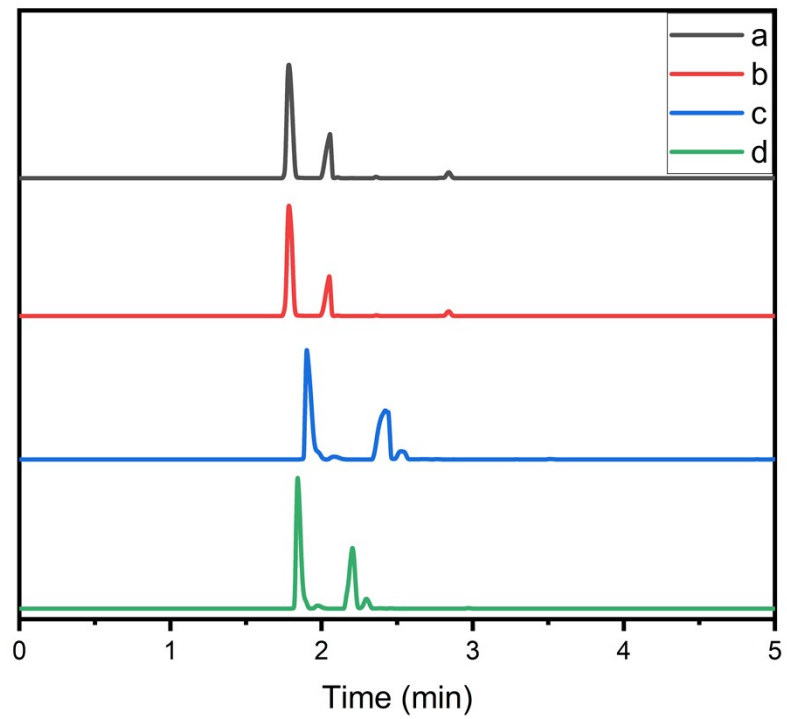

Figure. S3 GC spectrum of the product

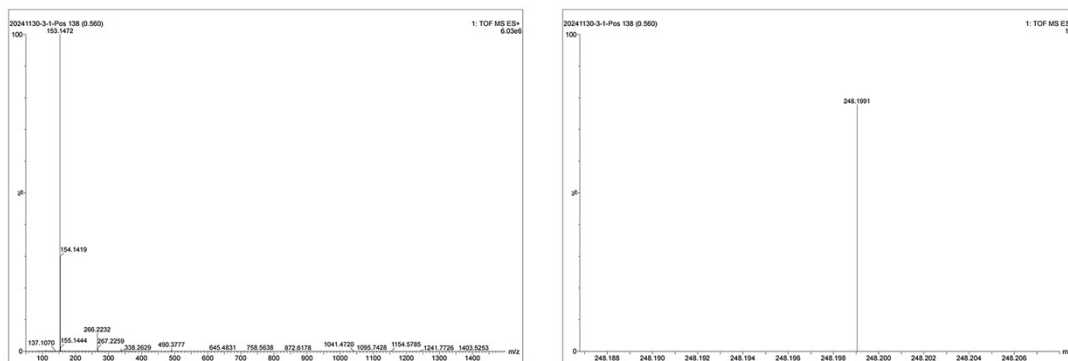

Figure. S4 HRMS of the [DBUH]PHY

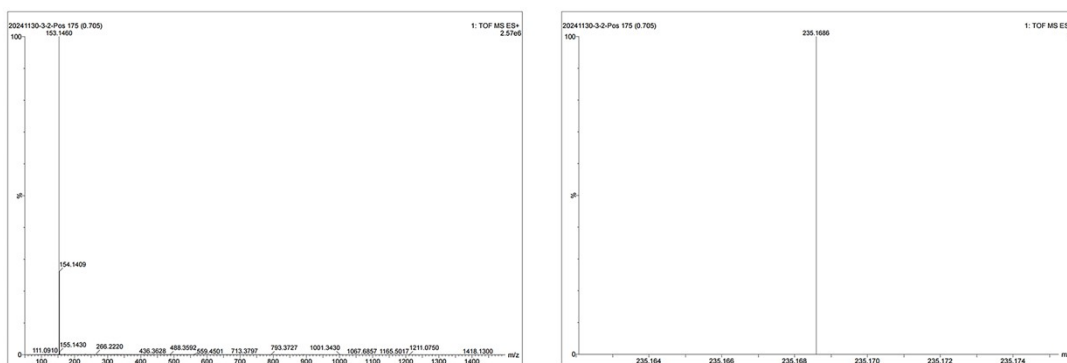

Figure. S5 HRMS of the [TBDH]PHY

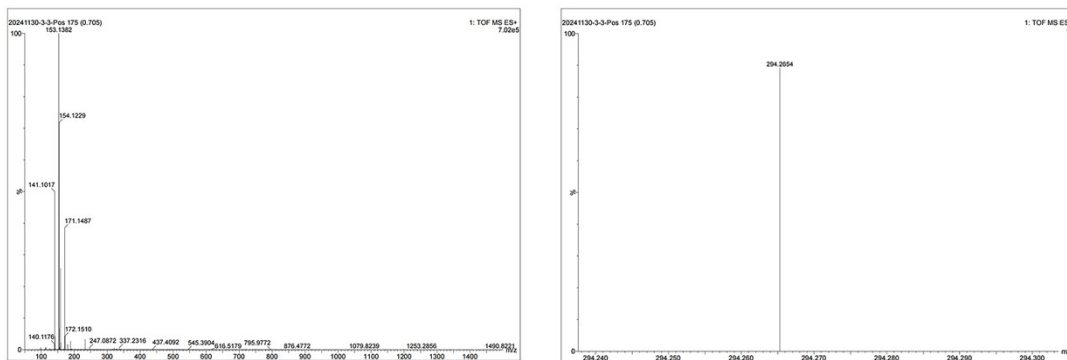

Figure. S6 HRMS of the [DBUH]TBD
